# Supplementary material for: Objectively Measured Sedentary Time and Cardiovascular Risk Factor Control in US Hispanics/Latinos With Diabetes Mellitus: Results From the Hispanic Community Health Study/Study of Latinos (HCHS/SOL)
Source: PubMed Central journal article supplement — J Am Heart Assoc. 2017 May 25;6(6):e004324. doi: 10.1161/JAHA.116.004324 (PMC5669141; doi:10.1161/jaha.116.004324), 2017-05-25
Supplement: JAH3-6-e004324-s001.pdf [file JAH3-6-e004324-s001.pdf]

# **SUPPLEMENTAL MATERIAL**

**Table S1.** Odds ratios (95% confidence intervals) of reaching blood pressure control goals by sedentary time and moderate-to-vigorous physical activity (MVPA)

tertiles among Hispanics/Latinos with diagnosed diabetes and hypertension (n=1,237)

|         | Sedentary time*   |                   |           |         | MVPA †    |                   |                   |         |
|---------|-------------------|-------------------|-----------|---------|-----------|-------------------|-------------------|---------|
|         | Tertile 1         | Tertile 2         | Tertile 3 | P-trend | Tertile 1 | Tertile 2         | Tertile 3         | P-trend |
| Model 1 | 1.50 (0.93, 2.43) | 1.31 (0.87, 1.97) | Reference | 0.103   | Reference | 1.11 (0.74, 1.68) | 1.12 (0.71, 1.76) | 0.699   |
| Model 2 | 1.39 (0.85, 2.30) | 1.27 (0.85, 1.93) | Reference | 0.200   | Reference | 1.05 (0.69, 1.59) | 0.96 (0.60, 1.56) | 0.805   |

Model 1 was adjusted for age, sex, annual household income, education, employment status, Hispanic/Latino background, field center, smoking, alcohol consumption, duration of diabetes, health insurance status, alternative healthy eating index-2010 (continuous), self-reported physical health score (continuous), and use of antidiabetic, antihypertensive and lipid-lowering medications; Model 2 was additionally adjusted for MVPA (continuous)\* or sedentary time (continuous)†.

Blood pressure control was defined based on the following cut-offs recommended by the American Diabetes Association: blood pressure control, systolic blood pressure <140mmHg and diastolic blood pressure <80 mmHg.

**Table S2.** Odds ratios (95% confidence intervals) of reaching lipid control goals by sedentary time and moderate-to-vigorous physical activity (MVPA) tertiles among Hispanics/Latinos with diagnosed diabetes and dyslipidemia (n=1,260)

| Outcome              | Sedentary time*   |                   |           |         | MVPA†     |                   |                   |         |
|----------------------|-------------------|-------------------|-----------|---------|-----------|-------------------|-------------------|---------|
|                      | Tertile 1         | Tertile 2         | Tertile 3 | P-trend | Tertile 1 | Tertile 2         | Tertile 3         | P-trend |
| LDL-c control        |                   |                   |           |         |           |                   |                   |         |
| Model 1              | 1.34 (0.77, 2.31) | 1.13 (0.69, 1.87) | Reference | 0.299   | Reference | 0.98 (0.61, 1.58) | 1.20 (0.71, 2.02) | 0.413   |
| Model 2              | 1.30 (0.72, 2.37) | 1.12 (0.68, 1.86) | Reference | 0.385   | Reference | 0.95 (0.58, 1.54) | 1.10 (0.62, 1.94) | 0.653   |
| HDL-c control        |                   |                   |           |         |           |                   |                   |         |
| Model 1              | 1.45 (0.90, 2.34) | 0.88 (0.57, 1.37) | Reference | 0.111   | Reference | 1.19 (0.76, 1.86) | 1.35 (0.86, 2.13) | 0.226   |
| Model 2              | 1.41 (0.85, 2.36) | 0.87 (0.56, 1.37) | Reference | 0.166   | Reference | 1.09 (0.70, 1.70) | 1.07 (0.65, 1.76) | 0.877   |
| Triglyceride control |                   |                   |           |         |           |                   |                   |         |
| Model 1              | 2.39 (1.48, 3.85) | 1.29 (0.84, 1.99) | Reference | <0.001  | Reference | 1.27 (0.82, 1.97) | 1.05 (0.67, 1.62) | 0.871   |
| Model 2              | 2.83 (1.71, 4.69) | 1.39 (0.90, 2.14) | Reference | <0.001  | Reference | 1.15 (0.74, 1.79) | 0.81 (0.50, 1.29) | 0.194   |

Model 1 was adjusted for age, sex, annual household income, education, employment status, Hispanic/Latino background, field center, smoking, alcohol consumption,

duration of diabetes, health insurance status, alternative healthy eating index-2010 (continuous), self-reported physical health score (continuous), and use of antidiabetic, antihypertensive and lipid-lowering medications; Model 2 was additionally adjusted for (MVPA) (continuous)\* or sedentary time (continuous)†.

Blood lipid control was defined based on the following cut-offs recommended by the American Diabetes Association: low-density lipoprotein cholesterol (LDL-c) control, LDL-c < 100 mg/dL; triglyceride control, triglycerides < 150 mg/dL; and high-density lipoprotein cholesterol (HDL-c) control, HDL-c > 40 mg/dL for men or > 50 mg/dL for women.



|                      |                   |                   |           |       |           |                   |                   |       |
|----------------------|-------------------|-------------------|-----------|-------|-----------|-------------------|-------------------|-------|
| Model1               | 1.21 (0.81, 1.82) | 1.11 (0.78, 1.59) | Reference | 0.350 | Reference | 1.22 (0.85, 1.75) | 1.29 (0.86, 1.95) | 0.302 |
| Model2               | 1.05 (0.69, 1.61) | 1.05 (0.74, 1.51) | Reference | 0.808 | Reference | 1.21 (0.84, 1.74) | 1.26 (0.83, 1.92) | 0.374 |
| LDL-c control        |                   |                   |           |       |           |                   |                   |       |
| Model1               | 1.09 (0.70, 1.71) | 0.83 (0.56, 1.24) | Reference | 0.674 | Reference | 0.87 (0.58, 1.28) | 1.04 (0.65, 1.65) | 0.667 |
| Model2               | 1.16 (0.72, 1.85) | 0.85 (0.57, 1.27) | Reference | 0.526 | Reference | 0.86 (0.57, 1.29) | 1.02 (0.62, 1.67) | 0.723 |
| HDL-c control        |                   |                   |           |       |           |                   |                   |       |
| Model1               | 1.25 (0.84, 1.86) | 0.91 (0.63, 1.32) | Reference | 0.258 | Reference | 1.04 (0.73, 1.49) | 1.17 (0.79, 1.74) | 0.401 |
| Model2               | 1.27 (0.83, 1.94) | 0.92 (0.63, 1.34) | Reference | 0.262 | Reference | 0.96 (0.67, 1.38) | 0.92 (0.61, 1.41) | 0.727 |
| Triglyceride control |                   |                   |           |       |           |                   |                   |       |
| Model1               | 1.88 (1.21, 2.90) | 1.24 (0.87, 1.78) | Reference | 0.004 | Reference | 1.20 (0.82, 1.75) | 1.20 (0.82, 1.77) | 0.465 |
| Model2               | 2.13 (1.34, 3.38) | 1.30 (0.90, 1.88) | Reference | 0.001 | Reference | 1.11 (0.75, 1.64) | 0.94 (0.63, 1.40) | 0.555 |

Model 1 was adjusted for age, sex, annual household income, education, employment status, Hispanic/Latino background, field center, smoking, alcohol consumption, duration of diabetes, health insurance status, alternative health eating index-2010 (continuous), self-reported physical health score (continuous), and use of antidiabetic, antihypertensive and lipid-lowering medications; Model 2 was additionally adjusted for MVPA (continuous)\* or sedentary time (continuous)†.

Major cardiovascular disease risk factor control was defined based on the following cut-offs recommended by the American Diabetes Association: glycemic control, hemoglobin A<sub>1c</sub><7.0% (<53mmol/mol); blood pressure control, systolic blood pressure<140mmHg and diastolic blood pressure<80 mmHg; low-density lipoprotein cholesterol(LDL-c) control, LDL-c<100mg/dL; triglyceride control, triglycerides<150 mg/dL; and high-density lipoprotein cholesterol(HDL-c) control, HDL-c>40 mg/dL for men or >50 mg/dL for women.

**Table S4.** Adjusted odds ratios for reaching major CVD risk factor control goals according to tertiles of sedentary time and levels of moderate-to-vigorous physical activity (MVPA) among adults with diagnosed diabetes (n=1,699)

|                        |       | Sedentary time    |                   |                   |
|------------------------|-------|-------------------|-------------------|-------------------|
|                        |       | Tertile 1         | Tertile 2         | Tertile 3         |
|                        | MVPA* |                   |                   |                   |
| Number of participants | Low   | 284               | 442               | 526               |
|                        | High  | 283               | 123               | 41                |
| Glycemic control       |       |                   |                   |                   |
|                        | Low   | 1.55 (0.94, 2.56) | 1.57 (1.05, 2.35) | Reference         |
|                        | High  | 2.10 (1.20, 3.68) | 0.88 (0.50, 1.56) | 1.04 (0.42, 2.56) |
| Blood pressure control |       |                   |                   |                   |
|                        | Low   | 1.34 (0.84, 2.16) | 1.01 (0.69, 1.48) | Reference         |
|                        | High  | 1.27 (0.74, 2.20) | 2.06 (1.17, 3.66) | 1.47 (0.55, 3.90) |
| LDL-c control          |       |                   |                   |                   |
|                        | Low   | 0.85 (0.51, 1.41) | 0.71 (0.46, 1.09) | Reference         |
|                        | High  | 1.05 (0.59, 1.87) | 0.88 (0.47, 1.64) | 0.24 (0.08, 0.72) |
| HDL-c control          |       |                   |                   |                   |
|                        | Low   | 1.56 (0.96, 2.52) | 0.96 (0.63, 1.46) | Reference         |
|                        | High  | 1.25 (0.74, 2.08) | 1.09 (0.62, 1.93) | 2.80 (1.06, 7.38) |
| Triglyceride control   |       |                   |                   |                   |
|                        | Low   | 2.07 (1.22, 3.52) | 1.35 (0.89, 2.04) | Reference         |
|                        | High  | 1.86 (1.07, 3.23) | 1.08 (0.63, 1.86) | 1.22 (0.51, 2.95) |



Values are odds ratios (95% confidence intervals). Adjusted for age, sex, annual household income, education, employment status, Hispanic/Latino background, field center, smoking, alcohol consumption, duration of diabetes, health insurance status, alternative healthy eating index-2010 (continuous), self-reported physical health score (continuous), and use of antidiabetic, antihypertensive and lipid-lowering medications.

Major cardiovascular disease (CVD) risk factor control was defined based on the following cut-offs recommended by the American Diabetes Association: glycemic control, hemoglobin A<sub>1c</sub><7.0% (<53mmol/mol); blood pressure control, systolic blood pressure<140mmHg and diastolic blood pressure<80 mmHg; low-density lipoprotein cholesterol (LDL-c) control, LDL-c<100mg/dL; triglyceride control, triglycerides<150 mg/dL; and high-density lipoprotein cholesterol (HDL-c) control, HDL-c>40 mg/dL for men or >50 mg/dL for women.

\*High MVPA defined according to the 2008 U.S. Physical Activity Guidelines for Americans as at least 150 minute/week moderate-intensity activity, 75 minute/week vigorous-intensity activity, or an equivalent combination of both.
